# Supplementary material for: Organic and inorganic geochemical cyclicity of a Maastrichtian oceanic open-shelf carbonate source rock
Source: Research Square preprint supplement (doi:10.21203/rs.3.rs-5449239/v1), 2025-04-10
Supplement: Supplementary file 1 [file 881270539f09cdc0687e1a3f.xlsx]

## Sheet: Supplementry table 1
Supplementry table 1: Spectral Gamma ray results of Jordan source rock characterization well
S.No	Depth (m)	CPS (GR)	GR (API)	U (ppm)	K (%)	Th (ppm)
1	24	85	46.8	3.7	0.7	1.5
2	24.4	112	56.4	4.8	0.7	1.7		Legend
3	24.7	110	56.4	5.2	0.5	1.7		CPS	Count per second
4	25	97	54	4.8	0.6	1.5		GR	Gamma Ray
5	25.3	120	64	6	0.6	1.6		API	American Petroleum Institute
6	25.5	136	76.8	7.2	0.6	2.4		U	Uranium
7	25.75	125	68.4	6.5	0.6	1.7		K	Potassium
8	26	85	41.6	3	0.7	1.6		Th	Thorium
9	26.25	110	56.4	5.4	0.6	0.9
10	26.5	150	84.4	8.6	0.5	1.9
11	26.75	146	80.8	8.8	0.5	0.6
12	27	120	62.4	6	0.6	1.2
13	27.2	133	75.6	7.5	0.6	1.5
14	27.5	135	72.4	7.5	0.5	1.1
15	27.75	147	83.2	8.7	0.4	1.8
16	28	114	61.2	6.3	0.5	0.7
17	28.2	148	81.6	8.1	0.7	1.4
18	28.5	147	82.4	7.8	0.6	2.6
19	28.75	160	88.8	8.9	0.6	2
20	29	141	76.8	7.4	0.6	2
21	29.25	150	78	7.8	0.5	1.9
22	29.5	138	70	6.8	0.6	1.5
23	29.75	140	72.4	7	0.6	1.7
24	30	110	54	5.1	0.5	1.3
25	30.25	124	66.8	6.3	0.6	1.7
26	30.5	118	50.8	5.1	0.4	0.9
27	30.75	116	56.4	5.7	0.4	1.1
28	31	110	59.2	5.8	0.5	1.2
29	31.25	137	77.6	8.1	0.3	2
30	31.55	125	63.2	6.2	0.4	1.8
31	31.85	118	58	5.4	0.5	1.7
32	32	116	58.4	5.5	0.6	1.2
33	32.25	121	69.2	6.7	0.5	1.9
34	32.5	108	59.2	5.9	0.6	0.6
35	32.75	102	56	5.3	0.5	1.4
36	33	126	72	7	0.5	2
37	33.3	147	80.4	8.4	0.4	1.7
38	33.5	146	74.8	8	0.4	1.1
39	33.75	130	63.2	6.2	0.5	1.4
40	34	143	70.8	7	0.5	1.7
41	34.25	169	92.4	9.6	0.5	1.9
42	34.5	152	76.4	8	0.4	1.5
43	34.75	132	66	6.8	0.5	0.9
44	35	132	78	7.9	0.5	1.7
45	35.25	179	93.2	9.3	0.7	1.9
46	35.5	155	76	7.9	0.5	1.2
47	35.75	127	66	6.6	0.6	0.9
48	36	98	47.2	4.5	0.5	0.8
49	36.25	130	62.4	6.3	0.4	1.4
50	36.5	134	74	7.6	0.6	0.9
51	36.75	138	78.8	8.4	0.3	1.7
52	37	122	56	5.4	0.5	1.2
53	37.25	137	68.4	7.2	0.4	1.1
54	37.5	137	69.2	7.2	0.5	0.9
55	37.75	173	100	10.5	0.5	2
56	38	104	59.2	5.8	0.5	1.2
57	38.25	124	64.4	6.6	0.5	0.9
58	38.5	129	70.4	7.2	0.5	1.2
59	38.75	140	83.6	9.2	0.3	1.3
60	39	127	72.8	7.7	0.4	1.2
61	39.25	141	79.2	8.7	0.5	0.4
62	39.5	132	72.4	7.5	0.5	1.1
63	39.75	133	73.6	7	0.6	2
64	40	116	67.6	6.8	0.5	1.3
65	40.25	156	86.8	8.9	0.6	1.5
66	40.5	150	78.8	8.4	0.4	1.3
67	40.75	150	81.6	8.8	0.5	0.8
68	41	125	74.4	7.4	0.5	1.8
69	41.25	134	71.2	7.7	0.5	0.4
70	41.5	137	80.4	8.5	0.5	1.1
71	41.75	165	91.2	9.9	0.4	1.4
72	42	99	54.8	5.3	0.5	1.1
73	42.5	127	60.8	6.1	0.5	1
74	42.75	132	72.8	7.6	0.5	1
75	43	118	58.4	5.6	0.5	1.4
76	43.25	120	59.2	5.7	0.6	1
77	43.5	143	75.2	7.9	0.5	1
78	43.75	140	69.6	6.9	0.5	1.6
79	44	106	57.2	5.5	0.5	1.3
80	44.25	113	63.2	6.3	0.5	1.2
81	44.5	127	64.8	6.9	0.5	0.4
82	44.7	130	66.4	5.9	0.7	2
83	45	116	56.8	5.6	0.5	1
84	45.25	108	55.6	4.9	0.7	1.3
85	45.4	114	62	6.3	0.5	0.9
86	45.8	107	49.6	4.6	0.6	0.8
87	46	111	57.2	5.6	0.5	1.1
88	46.5	128	64.4	6.5	0.5	1.1
89	46.75	103	48.8	4.3	0.5	1.6
90	47	96	48.4	4.2	0.6	1.3
91	47.25	110	56.4	5.5	0.5	1.1
92	47.5	121	63.6	6.6	0.4	1.1
93	47.7	110	43.6	4	0.4	1.3
94	48	82	47.2	4.6	0.5	0.6
95	48	115	58	5.9	0.4	1.1
96	48.25	118	63.2	6.3	0.4	1.6
97	48.6	117	58.8	5.9	0.5	0.9
98	49	127	72	7.6	0.4	1.2
99	49.25	147	74.8	7.9	0.5	0.9
100	49.5	139	70.4	7.2	0.6	0.8
101	49.75	146	82	7.9	0.7	1.9
102	50	123	72.8	7.6	0.4	1.4
103	50.25	131	70.4	6.8	0.6	1.6
104	50.6	118	70.8	7.1	0.5	1.5
105	50.8	119	61.2	6.1	0.5	1.1
106	51	100	50.4	4.9	0.4	1.2
107	51.25	116	59.6	6.2	0.4	0.9
108	51.5	119	56.4	5.6	0.5	0.9
109	51.75	118	53.6	5.4	0.4	1
110	52	100	51.2	4.9	0.5	1
111	52.25	124	60	5.8	0.7	0.6
112	52.5	124	66.8	6.6	0.4	1.9
113	52.75	126	63.6	6.7	0.4	0.9
114	53	99	49.2	4.7	0.6	0.5
115	53.25	117	65.2	6.9	0.4	0.9
116	53.5	118	61.6	6.1	0.5	1.2
117	53.75	111	58	6.1	0.4	0.7
118	54	100	53.2	4.8	0.5	1.7
119	54.25	112	63.2	6.5	0.4	1.2
120	54.5	110	59.2	6	0.5	0.8
121	54.75	118	56	5.6	0.5	0.8
122	55	98	47.2	4.4	0.5	1
123	55.25	126	63.2	6.2	0.4	1.8
124	55.5	130	70.4	7.3	0.4	1.4
125	55.75	131	64	6.3	0.5	1.4
126	56	90	45.6	3.9	0.6	1.2
127	56.25	108	59.2	6	0.5	0.8
128	56.5	125	67.6	7.2	0.4	0.9
129	56.75	117	62	6.3	0.5	0.9
130	57	102	54.8	5.2	0.4	1.7
131	57.24	139	78.4	7.8	0.5	2
132	57.5	134	63.6	6.3	0.5	1.3
133	57.75	129	72	6.8	0.6	2
134	58	133	76	7.6	0.5	1.8
135	58.25	142	80.8	8.4	0.5	1.4
136	58.5	132	70.8	6.9	0.6	1.5
137	58.75	133	72	7.2	0.5	1.6
138	59	120	67.6	6.7	0.6	1.1
139	59.25	121	61.6	6.2	0.5	1
140	59.5	121	66.8	6.4	0.5	1.9
141	59.75	118	62.8	6.8	0.4	0.5
142	60	113	64.4	6.8	0.4	0.9
143	60.25	120	66.4	6.5	0.6	1.2
144	60.5	128	66.8	6.9	0.5	0.9
145	60.75	138	73.2	7.9	0.4	0.9
146	61	112	55.6	5.1	0.5	1.7
147	61.25	129	70.8	7.1	0.4	1.9
148	61.5	140	76	8.6	0.3	0.6
149	61.75	148	85.6	8.5	0.6	2
150	62	119	60.4	5.8	0.5	1.5
151	62.25	133	72.8	7.6	0.4	1.4
152	62.5	135	70.4	7.1	0.6	1
153	62.75	131	66	6.4	0.5	1.7
154	62.9	124	63.6	6.5	0.4	1.3
155	63	142	81.6	8.8	0.4	1.2
156	63.5	195	110.4	12	0.6	1.2
157	63.75	198	115.6	12.5	0.6	1.5
158	64	190	114	12.5	0.5	1.5
159	64.5	250	162.4	18.5	0.5	1.6
160	64.75	260	160.4	18.3	0.5	1.5
161	65	190	110	12	0.5	1.5
162	65.5	205	117.6	12.9	0.6	1.2
163	65.75	186	111.6	12.2	0.5	1.5
164	66	153	92	9.1	0.7	2
165	66.2	200	119.2	13.3	0.4	1.6
166	66.75	251	152	17.3	0.4	1.8
167	67	204	114.8	12.7	0.5	1.3
168	67.25	318	182.4	21.2	0.3	2
169	67.5	401	235.6	28.4	0.3	0.9
170	67.75	383	233.2	27.1	0.6	1.7
171	68	396	247.6	29.7	0.4	0.9
172	68.25	505	322	38.1	0.5	2.3
173	68.5	531	330.8	39.1	0.7	1.7
174	68.85	383	236.4	27.7	0.4	2.1
175	69	501	293.6	35.2	0.3	1.8
176	69.25	311	187.2	21.9	0.5	1
177	69.5	375	227.6	27.2	0.6	0.1
178	69.75	350	209.6	24.8	0.6	0.4
179	70	239	132.8	14.9	0.6	1
180	70.25	330	202.4	23.8	0.5	1
181	70.5	270	172	20.2	0.4	1
182	70.9	200	124.8	14.7	0.3	0.6

## Sheet: Supplementry table 2
Supplementry table 2: Bulk organic geochemical properties of Jordan source rock characterization well
Sample	Depth (m)	S1 (mg/g)	S2 (mg/g)	S3 (mg/g)	Tmax (°C)	HI	OI	TOC (%)	PI	TS(org)	TS(inorg)	Total S (%)
C-1	23	0.02	5.75	2.33	428	289	117	1.99	0	0.16	0.27	0.43
C-2	23.5	0.01	3.25	1.45	430	291	130	1.12	0	0.06	0.3	0.36
J-01	24	4.57	112.06	4.53	412	826	33	13.56	0.04	2.4	0.59	2.99
J-02	24.34	1.91	65	2.79	412	832	36	7.81	0.03	1.57	0.18	1.75
J-03	25	2.76	95.03	3.23	412	832	28	11.42	0.03	2.12	0.28	2.4		Legend
J-04	25.59	2.18	75.84	3.22	411	823	35	9.22	0.03	1.71	0.29	2		S1	Free hydrocarbons
J-05	26	2.36	85.19	3.15	414	845	31	10.09	0.03	1.95	0.21	2.16		S2	Thermally cracked hydrocarbons
J-06	26.37	2.52	91.08	3.03	413	819	27	11.12	0.03	2.04	0.34	2.38		S3	CO2 produced relative to TOC
J-07	27	2.36	91.5	3.15	416	842	29	10.86	0.03	2.08	0.26	2.34		Tmax	Maturity parameter
J-08	27.45	4.88	147.69	4.09	411	853	24	17.32	0.03	3.55	0.8	4.35		HI	Hydrogen Index
J-09	28	4.06	128.64	3.81	410	839	25	15.32	0.03	3.07	0.76	3.83		OI	Oxygen Index
J-10	28.45	4.7	141.77	3.98	414	873	25	16.24	0.03	3.24	0.39	3.63		TOC	Total Organic Carbon
J-11	29	4.1	129.84	3.8	411	830	24	15.64	0.03	3.08	0.75	3.83		PI	Production Index
J-12	29.4	3.64	104.36	3.21	410	852	26	12.25	0.03	2.57	0.2	2.77		TS(org)	Total organic sulfur
J-13	30	4.2	127.87	3.77	410	866	25	14.77	0.03	3.09	0.84	3.93		TS(inorg)	Total inorganic sulfur
J-14	30.46	3.75	113.74	3.93	409	832	29	13.67	0.03	2.7	0.58	3.28		Total S	Total sulfur
J-15	31	3.28	107.56	3.99	413	831	31	12.94	0.03	2.67	0.87	3.54
J-16	31.5	3.28	92.8	3.86	410	819	34	11.33	0.03	2.46	0.8	3.26
J-17	32	2.87	88.42	3.58	413	815	33	10.84	0.03	2.24	0.68	2.92
J-18	32.5	2.36	75.01	3.1	410	814	34	9.21	0.03	2.01	0.46	2.47
J-19	33	2.27	77.56	2.84	410	848	31	9.15	0.03	1.81	0.28	2.09
J-20	33.45	2.88	91.33	3.34	410	827	30	11.04	0.03	2.13	0.37	2.5
J-21	34	2.36	69.29	3.57	408	803	41	8.63	0.03	1.77	0.47	2.24
J-22	34.6	2.86	91.48	3.71	411	831	34	11.01	0.03	2.11	0.44	2.55
J-23	35	3.06	99.5	3.71	412	831	31	11.97	0.03	2.28	0.44	2.72
J-24	35.5	1.84	75.77	2.75	411	840	30	9.02	0.02	1.66	0.2	1.86
J-25	36	0.5	20.01	1.37	410	840	57	2.38	0.02	0.55	0.1	0.65
J-26	36.45	5.13	122.32	4.43	405	859	31	14.24	0.04	2.82	0.3	3.12
J-27	37	0.55	19.76	1.36	407	830	57	2.38	0.03	0.56	0.11	0.67
J-28	37.66	2.35	104.06	3.64	407	873	31	11.92	0.02	2.51	0.24	2.75
J-29	38	2.07	101.57	3.4	408	866	29	11.74	0.02	2.36	0.24	2.6
J-30	38.43	5.86	156.46	4.61	406	840	25	18.62	0.04	3.68	0.37	4.05
J-31	39	5.53	150.26	4.39	408	848	25	17.72	0.04	3.42	0.39	3.81
J-32	39.4	4.69	107.27	3.18	411	859	25	12.49	0.04	2.53	0.51	3.04
J-33	40	6.46	149.16	4.47	409	863	26	17.29	0.04	3.39	0.69	4.08
J-34	40.5	3.01	74.76	2.03	408	845	23	8.85	0.04	1.72	0.67	2.39
J-35	41	4.31	117.52	3.38	411	861	25	13.65	0.04	2.77	0.61	3.38
J-36	41.5	6	153.69	4.42	407	854	25	17.99	0.04	3.66	0.32	3.98
J-37	41.9	6.61	168.77	4.41	407	847	22	19.92	0.04	4.32	0.66	4.98
J-38	42.5	8	143.29	4.74	409	859	28	16.68	0.05	3.11	0.48	3.59
J-39	43	5.75	149.38	4.12	410	847	23	17.64	0.04	3.77	0.64	4.41
J-40	43.5	7.6	153.83	4	407	878	23	17.51	0.05	3.34	0.5	3.84
J-41	44	6.54	140.75	3.93	405	856	24	16.45	0.04	3.36	0.8	4.16
J-42	44.5	5.19	109.11	2.85	407	843	22	12.94	0.05	2.72	0.75	3.47
J-43	45	5.62	148.05	4.33	408	844	25	17.54	0.04	3.74	0.68	4.42
J-44	45.5	4.81	105.08	3.49	410	840	28	12.51	0.04	2.91	0.56	3.47
J-45	46	4.44	102.45	3.48	410	846	29	12.11	0.04	2.76	0.51	3.27
J-46	46.5	4.11	80.75	3.46	408	814	35	9.92	0.05	2.45	0.8	3.25
J-47	47	3.6	86.51	3	411	842	29	10.27	0.04	2.3	0.49	2.79
J-48	47.5	4.45	105.19	3.13	412	845	25	12.45	0.04	2.93	0.59	3.52
J-49	48	3.03	83.21	3.01	409	851	31	9.78	0.04	2.18	0.49	2.67
J-50	48.54	1.78	51.83	1.77	409	820	28	6.32	0.03	1.2	0.47	1.67
J-51	49	8.13	190.49	4.44	406	858	20	22.19	0.04	4.37	0.58	4.95
J-52	49.5	4.85	123.18	3.86	408	835	26	14.75	0.04	2.99	0.77	3.76
J-53	50	6.09	166.01	3.93	404	850	20	19.53	0.04	4.14	0.81	4.95
J-54	51	3.51	101.52	3	408	830	25	12.23	0.03	2.46	0.28	2.74
J-55	51.42	6.17	161.88	3.91	407	840	20	19.27	0.04	3.81	0.53	4.34
J-56	52	5.02	133.51	3.9	408	844	25	15.83	0.04	3.19	0.65	3.84
J-57	52.4	6.28	172.34	3.98	408	846	20	20.38	0.04	4.13	0.74	4.87
J-58	53	6.05	151.76	4.19	405	843	23	18.01	0.04	3.58	0.75	4.33
J-59	53.5	5.18	151.46	3.75	407	838	21	18.07	0.03	3.6	0.86	4.46
J-60	54	4.33	131.84	3.58	409	839	23	15.72	0.03	3.02	0.39	3.41
J-61	54.43	5.01	143.16	3.52	406	842	21	17	0.03	3.38	0.63	4.01
J-62	55	6.3	158.97	4	406	844	21	18.84	0.04	3.7	0.62	4.32
J-63	55.47	5.99	158.86	3.75	408	841	20	18.88	0.04	3.69	0.53	4.22
J-64	56	5.04	131.85	3.54	408	845	23	15.6	0.04	3.04	0.42	3.46
J-65	56.45	5.29	154.38	3.73	409	859	21	17.97	0.03	3.71	0.64	4.35
J-66	57	4.82	145.86	3.71	407	894	23	16.31	0.03	3.05	0.42	3.47
J-67	57.5	4.97	132.61	3.67	406	860	24	15.42	0.04	3.63	0.81	4.44
J-68	58	5.34	152.78	3.21	409	864	18	17.69	0.03	3.52	0.48	4
J-69	58.5	3.16	86.71	2.82	407	822	27	10.55	0.04	2.97	0.76	3.73
J-70	59	4.97	151.78	3.42	405	865	20	17.54	0.03	3.29	0.37	3.66
J-71	59.6	4.19	120	3.12	406	826	21	14.53	0.03	2.72	0.28	3
J-72	60	4.67	142.54	3.39	408	839	20	16.99	0.03	3.37	0.33	3.7
J-73	60.53	5.66	172.72	3.09	404	854	15	20.23	0.03	4.24	0.35	4.59
J-74	61	3.7	128.96	2.68	409	858	18	15.04	0.03	3.23	0.47	3.7
J-75	61.54	3.66	134.76	2.57	413	858	16	15.71	0.03	2.91	0.29	3.2
J-76	62	2.41	104.33	2.22	415	844	18	12.36	0.02	2.29	0.25	2.54
J-77	62.57	3.44	140.94	2.25	411	857	14	16.45	0.02	3.37	0.51	3.88
J-78	63	2.35	89.6	2.26	412	843	21	10.63	0.03	1.84	0.24	2.08
J-79	63.4	2.63	118.83	2	415	839	14	14.17	0.02	2.61	0.19	2.8
J-80	64	0.23	51.32	1.45	409	791	22	6.48	0	1.52	0.32	1.84
AHP-05	64.5	0.06	33.03	1.15	411	734	26	4.5	0	0.92	0.19	1.11
AHP-06	65	0.58	66.03	1.72	408	828	22	7.97	0.01	1.86	0.11	1.97
AHP-07	65.5	0.87	82.85	1.32	410	835	13	9.92	0.01	2.26	0.1	2.36
AHP-08	66	0.18	37.47	1.24	409	774	26	4.84	0	1.03	0.18	1.21
AHP-09	66.4	0.94	113.87	1.91	408	815	14	13.98	0.01	2.94	0.18	3.12
AHP-10	67	0.92	104.12	1.83	408	800	14	13.01	0.01	2.63	0.11	2.74
AHP-11	67.5	0.05	14.39	1.18	402	707	58	2.04	0	0.36	0.06	0.42
AHP-12	68	0.42	57.51	1.51	404	794	21	7.24	0.01	1.77	0.16	1.93
AHP-13	68.5	0.54	59.84	1.44	402	783	19	7.64	0.01	1.6	0.5	2.1
AHP-14	69	0.03	8.41	1.01	398	602	72	1.4	0	0.38	0.41	0.79
AHP-15	69.5	0.04	8.22	1.1	402	638	85	1.29	0.01	0.47	0.23	0.7
AHP-16	70	0.01	0.48	0.28	410	515	298	0.09	0.02	0.01	0.03	0.04
AHP-17	70.5	1.78	56.82	1.28	392	752	17	7.56	0.03	1.95	0.61	2.56
AHP-18	71	1.65	77.98	1.48	396	793	15	9.84	0.02	2.31	0.76	3.07

## Sheet: Supplementry table 3
Supplementry table 3: XRD results showing dominant mineralogical composition and concentration in the Jordan source rock characterization well
S. No	Depth [m]	Carbonates		Silicates		Clays	Apatite	Sulfate/Sulfide
		Calcite (%)	Dolomite (%)	Quartz (%)	Opal CT (%)	Kaolinite (%)	Fluor-apatite (%)	Gypsum (%)	Pyrite (%)	Sphalerite (%)
1	20	71.3	0.3	7.7	0.3	6.7	4.5	7.2	1	1
2	23	69.9765	0.415514	8.79041	2.56725	3.79963	4.98348	7.05537	0.96323	1.44858
3	24	76.3371	0.406951	6.98849	1.36024	2.76471	6.74672	2.14435	1.39334	1.85807
4	25.59	68.8	0.293323	15.9481	0.54673	3.57	4.7733	2.78524	1.40339	1.88438
5	27.45	70.78	0.399154	8.5813	0.890812	2.63	7.27297	3.48417	2.62859	3.33478
6	29.4	68.1584	0.412548	6.44622	0.525283	2.739	8.95553	4.89916	3.6389	4.22499
7	33	78.77	0.271475	4.9182	0.51053	2.57	4.59639	4.151	1.77278	2.44359
8	34.6	77.7496	1.353	6.93682	1.1148	5.03	2.76581	2.44427	1.57355	1.03107
9	36	82.06	0.32768	3.50019	0.307787	4.63	4.06862	2.05333	1.66701	1.38285
10	36.45	73.2725	0.605772	8.29008	0.653583	5.37223	5.63448	3.21644	1.27238	1.68249
11	37	81.9244	0.630903	5.677	0.466843	2.9	4.76412	1.24626	0.932277	1.45786
12	37.66	55.93	3.46827	10.2767	0.551412	3.93	12.91	9.1426	2.19786	1.58991
13	38.43	72.8762	1.02673	6.71715	0.168969	4.35519	4.01552	7.21371	2.05939	1.56709
14	40.5	18.43	3.13106	6.09879	56.5951	1.51	4.83448	5.00377	0.870506	3.52253
15	41.9	41.5	1.31177	35.7402	2.68526	2.6	9.99164	2.89401	2.44292	0.838508
16	44.5	59.0233	1.59739	10.9585	14.8503	1.58924	5.55225	3.43743	2.54565	0.445896
17	48.54	18.51	1.27438	8.1851	55.4307	2.15	4.42703	7.62345	0.84852	1.61527
18	49	68.9393	2.23065	13.5461	1.55004	1.11529	6.46623	2.54795	2.47099	1.13345
19	51	45.1584	20.9852	17.4501	1.63944	1.22215	6.03216	3.54073	1.75922	2.21265
20	52.4	75.9014	0.674524	11.7369	0.363963	0.332793	4.9206	2.68455	2.99121	0.394022
21	55.47	75.0502	1.00116	10.1733	1.70122	1.38622	1.6182	3.44796	4.54029	1.08149
22	57.5	64.3	1.86473	10.64	3.72347	3.79	6.12159	2.90623	6.15436	0.498233
23	58.5	49.17	6.44449	14.58	2.65754	6.50757	3.60097	3.74651	9.43902	3.8575
24	60.53	68.7757	2.49309	7.10222	2.58395	3.49101	6.86074	2.30524	2.22698	4.16108
25	62.57	86.4076	0.434642	3.44829	0.673515	3.83593	2.80426	1.21704	0.985429	0.193269
26	63.4	75.0494	0.640127	5.82182	2.29121	4.33233	5.45202	2.24068	3.73931	0.43305
27	64.5	67.4013	0.907735	1.53513	1.7013	0.392793	22.9777	2.32279	1.62501	1.13623
28	65.5	61.1	0.7	7.9	6.4	3.4	13.5	4.5	1.8	0.7

## Sheet: Supplementry table 4
Supplementry table 4: XRF results showing major and minor elemental composition and concentration in the Jordan source rock characterization well
S.No	Depth	Ca	Si	P	S	Al	K	Ti	Fe	Mg
	(m)	(%)	(%)	(%)	(%)	(%)	(%)	(%)	(%)	(%)
1	20	48.183	18.7268	2.10626	8.23012	7.89689	0.550142	0.748193	6.23703	1.63471
2	23	48.2167	19.1915	2.31555	4.84052	7.80227	0.529525	0.792792	4.96018	2.42325
3	24	42.9792	16.0646	2.10785	7.91447	5.86555	0.565128	0.680297	3.43898	1.55075
4	25.59	44.63	15.0157	3.47185	6.36833	5.31583	0.5052	0.533267	2.54845	1.69242
5	27.45	42.27	17.2738	2.62502	10.0829	6.20365	0.611555	0.580459	3.56567	1.23347			Legend
6	29.4	47.882	12.5918	2.45555	7.3774	4.97015	0.40255	0.381081	2.5629	2.18585			Ca	Calcium
7	33	48.6865	9.77825	4.0589	5.21389	3.69243	0.376573	0.411955	1.90308	1.84622			Si	Silica
8	34.6	46.7324	14.7861	3.37187	7.32893	5.43679	0.56012	0.607493	3.6366	1.13696			P	Phosphorus
9	36	67.3862	5.82998	3.87283	1.84657	1.58396	0.236351	0.170007	1.08915	1.05321			S	Sulfur
10	36.45	57.4569	10.2908	4.06399	8.04367	2.57851	0.366282	0.404073	2.23258	1.76746			Al	Aluminium
11	37	65.7315	4.80705	3.3004	1.63045	1.37495	0.123798	0.260766	1.00619	1.63571			K	Potassium
12	37.66	53.617	9.7467	8.31618	7.53273	2.97711	0.406233	0.336593	1.96733	2.14433			Ti	Titanium
13	38.43	45.3004	12.2613	4.08435	11.4778	3.70632	0.567042	0.427336	2.68729	1.66004			Fe	Iron
14	40.5	13.3971	49.4258	3.37383	5.7398	1.49164	0.313698	0.136062	0.571964	1.26991			Mg	Magnesium
15	41.9	20	40	4.62574	13.8088	3.04513	0.47329	0.306597	2.42301	1.89316
16	44.5	18.9681	45.5267	4.38849	8.99346	3.28926	0.593191	0.227718	1.48438	1.2904
17	48.54	12.6642	68.9828	3.15837	5.062	1.17785	0.129164	0.0768833	0.621217	1.16248
18	49	37.2126	12.8711	4.13202	12.4253	2.20732	0.372759	0.243633	1.68838	2.37543
19	51	44.9547	16.6398	3.51196	7.6408	2.20782	0.395027	0.211042	1.60446	4.00168
20	52.4	36.6398	16.4398	2.36554	11.6741	2.67764	0.450814	0.324487	1.82803	1.90977
21	55.47	40.541	14.5262	2.05863	10.5322	3.19868	0.432867	0.349817	2.3103	1.55027
22	57.5	33.9988	20.6753	3.62105	9.29598	5.0331	0.879856	0.607074	4.49555	1.62065
23	58.5	34.2865	22.7426	1.85196	7.48921	7.65196	0.82777	0.805322	6.4089	2.12134
24	60.53	42.7004	9.97204	2.0999	10.5167	3.02168	0.490469	0.364771	2.89105	1.88547
25	62.57	40.8491	13.8041	2.63307	9.51555	4.51272	0.589182	0.508365	4.0982	1.69716
26	63.4	49.4713	10.4131	2.99723	8.209	2.92132	0.239517	0.316738	1.9109	2.12293
27	64.5	60.625	3.27016	18.7717	3.75374	0.942968	0.09067	0.222141	0.782784	2.30302
28	65.5	52.7212	13.0252	6.24661	5.81932	1.67054	0.184697	0.22329	1.07786	1.77254

## Sheet: Supplementry table 5
Supplementry table 5: ICP-OES results showing trace elemental composition and concentration in the Jordan source rock characterization well
S.No	Depth	Mo	Ni	Ti	U	V	Zn	Zr	Cu
	(m)	(ppm)	(ppm)	(ppm)	(ppm)	(ppm)	(ppm)	(ppm)	(ppm)
1	20	14.15	137.683	1240.73	18.01	125.173	221.143	27.4325	65.345
2	23	14.31	126.833	1370.43	16.88	99.7767	200.31	25.22	57.8
3	24	42.42	150.05	1358.64	18.61	119.233	244.897	25.69	77.4825
4	25.59	23.0933	108.11	979.726	28.55	97.25	203.97	21.5675	54.135
5	27.45	42.24	185.31	1260.85	24.61	142.583	340.423	28.1625	90.035
6	29.4	29.41	129.453	887.156	19.39	99.9233	259.207	22.21	58.09			Legend
7	33	22.96	85.69	710.128	26.45	77.0933	205.917	19.815	47.835			Mo	Molybdenum
8	34.6	20.1733	127.07	1151.26	24.47	98.4267	197.557	25.3125	62.5125			Ni	Nickel
9	36	30.6167	23.3233	261.41	18.18	54.7	66.0367	11.7725	13.3175			Ti	Titanium
10	36.45	66.2933	115.02	571.336	32.61	153.543	225.89	23.39	73.795			U	Uranium
11	37	23.4833	21.2033	236.994	18.24	48.6567	67.6133	9.505	12.4425			V	Vanadium
12	37.66	77.2367	114.547	634.212	39.01	110.51	367.003	25.84	83.1125			Zn	Zinc
13	38.43	129.847	171.91	724.516	27.47	170.21	488.067	24.1575	141.107			Zr	Zircon
14	40.5	110.257	83.6267	365.978	19.39	158.873	371.833	16.8075	55.6675			Cu	Copper
15	41.9	209.83	203.223	540.484	40.28	240.233	945.157	24.47	118.535
16	44.5	165.817	125.043	831.416	21.92	289.463	705.87	25.27	82.585
17	48.54	158.24	87.6867	227.928	12.75	108.24	380.497	13.09	70.49
18	49	168.093	227.95	495.132	29.29	245.403	2913.64	25.3025	147.785
19	51	81.3267	105.213	445.668	15.93	173.067	395.113	17.53	72.8325
20	52.4	127.133	170.633	538.506	21.58	152.157	644.49	21.4975	97.6925
21	55.47	123.173	174.707	650.738	19.81	162.867	499.667	23.2775	113.48
22	57.5	184.557	140.17	1181.07	22.06	272.727	491.377	31.5675	71.12
23	58.5	56.0133	100.183	1563.9	15.95	216.833	185.583	29.715	61.4075
24	60.53	87.0733	160.873	734.64	19.36	167.493	349.547	25.8125	75.005
25	62.57	48.23	182.323	1003.66	25.71	214.403	405.723	27.42	101.68
26	63.4	26.4167	149.017	476.004	35.1	106.217	308.157	16.89	77.42
27	64.5	46.2533	83.0767	115.162	28.7	129.953	150.693	26.1375	36.935
28	65.5	59.6533	140.607	343.544	23.34	415.793	536.923	14.57	60.77

## Sheet: Supplementry table 6
Supplementry table 6: Comparision of different source rock's TOC and elemental geochemical composition with Jordan source rock
	Name	TOC	Geological Age	CaO	SiO2	Al2O3	Mo	U	V	Ni	Cu	Zn	References
		%		%	%	%	ppm	ppm	ppm	ppm	ppm	ppm
1	Avg. Shale	0.2		2.2	58.9	16.7	1000	3700	130000	68000	45000	95000	Brumsack 2006
2	Eagle Ford (USA)	3.8	L. Cretaceous	34.6	20.83	5.54	11000	3000	148000	37000	22000	77000	Beau and Shariva., 2016
3	Bilong Co oil shales (China)	9.2	E. Jurassic	32.1816	21.528	5.6685	35030	4000	100000	71450	50370	109700	X. Fu et al., 2011		Legend
4	Gulf of California (Mexico)	4.35	Recent	2.07	62.6	8.91	12000	5700	101000	38000	27000	88000	Brumsack & Gottingen 1989		TOC	Total Organic Carbon
5	Hayrettin Fm (Turkey)	9.73	Oligocene	3.75	41.85	14.28	18710	15820	164610	91620	32320	45890	D. B. Koralay., 2018		CaO	Calcium oxide
6	Ghareb Oil shales (Hatrurim Basin)	8.52	L. Cretaceous	37.3	8.84	3.37	11900	16500	95200	127000	61900	158000	Sokol et al., 2019		SiO2	Silicon dioxide
7	Black shales (Tarfaya basin)	10	L. Cretaceous	29.8	21.84	3.57	36310	12660	151270	59270	22350	111760	Sajid et al., 2014		Al2O3	Aluminium oxide
8	Black sea sapropels	16.6	Recent	4.97	29.4	8.86	117000	14800	196000	110000	106000	83000	Brumsack & Gottingen 1989		Mo	Molybdenum
9	JSR (Jordan) (This study)	13.35	L. Cretaceous	28.875	25.1064	4.88417	85580.6	24030	153338	130930	77480	389207	This Study		U	Uranium
10	Posidonia shales (Germany)	9.15	E. Jurassic	20.9	27.2	7.9	84000	8700	245000	171660	97000	328670	Brumsack et al., 1991		V	Vanadium
11	Black shale (Lomonosov Ridge) Artctic	3.4	Eocene	2.79	46.02	11.77	53920	17200	266240	81660	140440	230890	Marz et al., 2011		Ni	Nickel
12	Mediterranean sappropels	6.91	Recent	19.8	22.9	7.69	105000	15500	518000	208000	127000	96000	Warning and Brumsack (2000)		Cu	Copper
13	Paleozoic black shales (Sweden)	7	Paleozoic	0.305151	52.7994	10.8877	175215	82617	578503	45422.3	61154.3	54285.2	S. Ofili et al., 2022		Zn	Zinc
14	La Luna (Venezuelan Basin)	3.51333	L. Cretaceous	34.36	30.604	2.35	50000	5828.57	356000	145333	34000	653933	S.Lo Monaco et al., 2002
15	Paleozoic black shales (Russia)	6	Paleozoic	0.86631	47.0578	11.777	189112	105868	986301	127453	99546.3	214984	S. Ofili et al., 2022
16	Paleozoic black shales (Estonia)	5	Paleozoic	2.20342	58.4019	8.1791	142070	169237	666927	123271	87758.5	656985	S. Ofili et al., 2022
